# Supplementary material
Source: PubMed Central journal article supplement (PMC5509218)

Supplementary Figure 1. Uncropped blots with protein standards in kDa

Figure 2a (left)

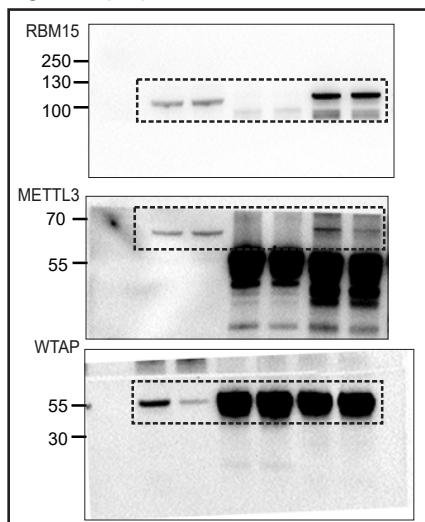

Figure 2a (right)

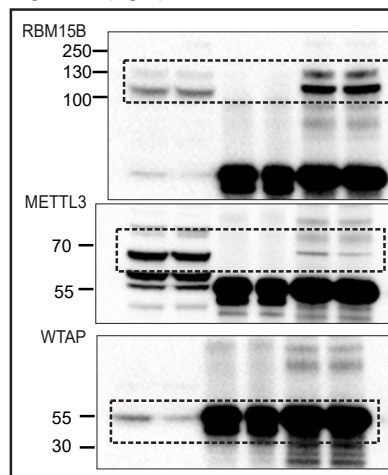

Extended Data Figure 3a

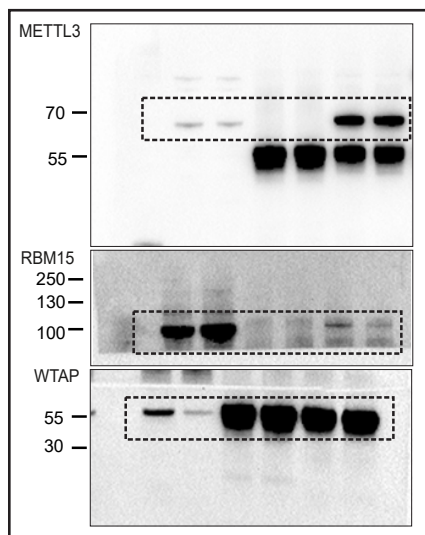

Extended Data Figure 3b

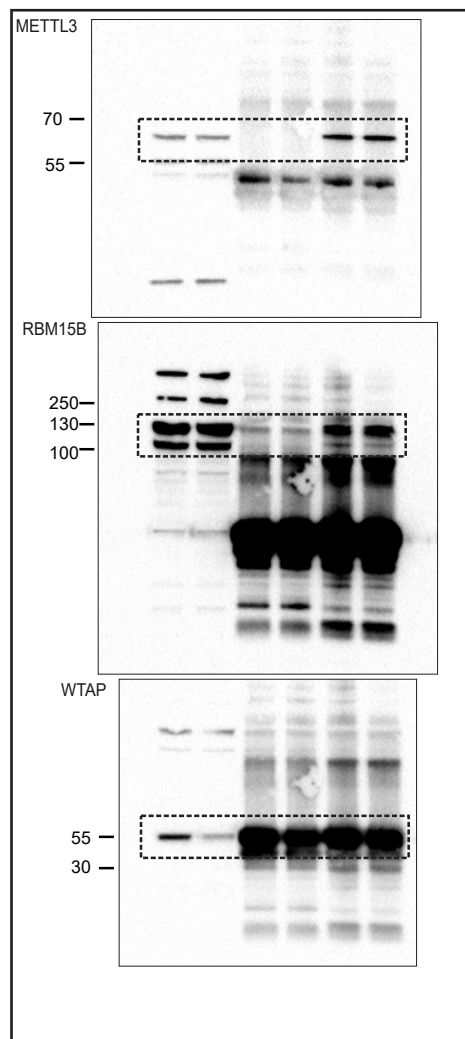

Extended Data Figure 3d

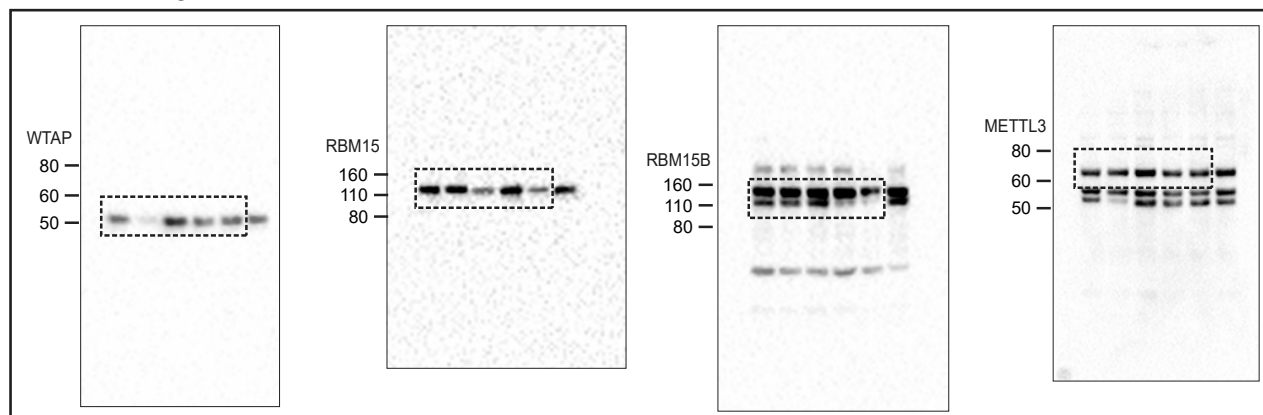

Extended Data Figure 9a (extreme right)

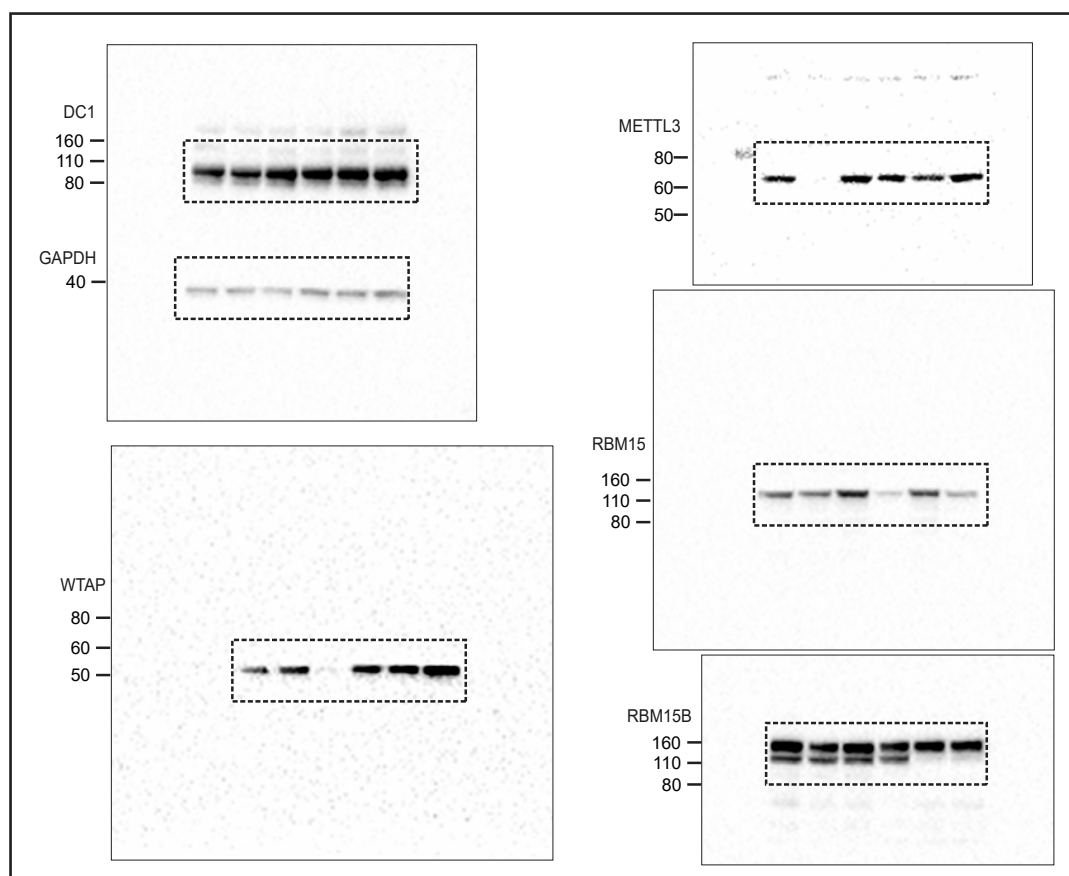

Supplement: NIHMS870841-supplement-Supplementary_Data.pdf [file NIHMS870841-supplement-Supplementary_Data.pdf]
